# Supplementary material
Source: publisher figshare collection journal article supplement (https://gsapubs.figshare.com/ndownloader/files/22740983)
Supplement: Supplementary file 1 [file 22740983]

## GSA Data Repository item

Additional tables and appendices for:

Sohl, L.E., Christie-Blick, N., and Kent, D.V., 1999, Paleomagnetic polarity reversals in Marinoan (~600 Ma) glacial deposits of Australia: Implications for the duration of low-latitude glaciation in the Neoproterozoic: Geological Society of America Bulletin, v. \*\*\*, p. \*\*\*\*\_\*\*\*\*.

The following table is a summary of Australian paleopoles compared to the results of this study (as seen in Fig. 12).

TABLE DR1. NEOPROTEROZOIC-CAMBRIAN PALEOPOLES FOR AUSTRALIA

| Lithologic unit                             | Unit location      | Pole ID | $\lambda^*$<br>( $^{\circ}$ N) | $\phi$<br>( $^{\circ}$ E) | $\alpha_{95}$<br>( $^{\circ}$ ) | Reference                      |
|---------------------------------------------|--------------------|---------|--------------------------------|---------------------------|---------------------------------|--------------------------------|
| <b>Neoproterozoic</b>                       |                    |         |                                |                           |                                 |                                |
| Yalipena Fm - total                         | C. Flinders Ranges | YA      | -44.2                          | 352.7                     | 11.0                            | this study                     |
| Elatina Fm - total                          | C. Flinders Ranges | EA      | -38.9                          | 5.6                       | 12.7                            | this study                     |
| Elatina Fm                                  | C. Flinders Ranges | E1      | -50.9                          | 337.1                     | 2.2                             | Embleton and Williams, 1986    |
| Elatina Fm                                  | C. Flinders Ranges | E2      | -52.4                          | 347.1                     | 7.4                             | Schmidt and Williams, 1995     |
| Brachina Fm                                 | Mt. Lofty Ranges   | BR1     | -45.7                          | 355.6                     | 11.3                            | Karner, 1974                   |
| Brachina Fm                                 | C. Flinders Ranges | BR2     | -33.0                          | 328.0                     | 2.0                             | McWilliams and McElhinny, 1980 |
| Bunyeruo Fm                                 | C. Flinders Ranges | BY1     | -7.0                           | 17.0                      | 14.0                            | McWilliams and McElhinny, 1980 |
| Bunyeruo Fm                                 | C. Flinders Ranges | BY2     | -18.1                          | 16.3                      | 11.8                            | Schmidt and Williams, 1996     |
| Bunyeruo Fm (meteorite impact meltrock)     | C. Flinders Ranges | BA      | -8.6                           | 353.4                     | 6.0                             | Schmidt and Williams, 1991     |
| Lower Arumbera Sandstone                    | NE Amadeus Basin   | LA      | -44.3                          | 341.9                     | 12.0                            | Kirschvink, 1978a              |
| <b>Cambrian</b>                             |                    |         |                                |                           |                                 |                                |
| Hawker Group - base (avg)                   | C. Flinders Ranges | HG1     | -26.7                          | 2.3                       | 12.5                            | Klootwijk, 1980                |
| Upper Arumbera Sandstone                    | NE Amadeus Basin   | UA      | -46.6                          | 337.3                     | 4.1                             | Kirschvink, 1978a              |
| Todd River Dolomite                         | NE Amadeus Basin   | TRD     | -43.2                          | 339.9                     | 6.7                             | Kirschvink, 1978a              |
| Hawker Group - top (avg)                    | C. Flinders Ranges | HG2     | -12.6                          | 30.7                      | 15.9                            | Klootwijk, 1980                |
| Lake Frome Group - base (avg)               | C. Flinders Ranges | LFG     | -29.3                          | 26.1                      | 13.1                            | Klootwijk, 1980                |
| Tempe Fm                                    | NE Amadeus Basin   | T       | -35.9                          | 13.0                      | 14.1                            | Klootwijk, 1980                |
| Illara Sandstone                            | NE Amadeus Basin   | IS      | -29.5                          | 11.1                      | 10.8                            | Klootwijk, 1980                |
| Pantapinna Sandstone (upper Lake Frome Grp) | C. Flinders Ranges | PS      | -36.4                          | 29.2                      | 16.8                            | Klootwijk, 1980                |
| Deception Fm                                | NE Amadeus Basin   | D       | -32.2                          | 10.6                      | 6.5                             | Klootwijk, 1980                |

Note: Pole ID is the mnemonic used in Fig. 11;  $\lambda$ ,  $\phi$  are the latitude, longitude of the paleopole;  $\alpha_{95}$  is the radius of 95% circle of confidence for the paleopole.  
 \* All poles are listed here as south poles for comparison purposes.

The following table gives the breakdown of NNE vs. SW directions in this study as compared to previously published results. See text in the section "Comparison with Other Neoproterozoic Paleomagnetic Results" for a further discussion of this data.

TABLE DR2. COMPARISON OF ELATINA FORMATION SAMPLE AND SITE DATA

|                                    | N   | Dm<br>( $^{\circ}$ E) | Im<br>( $^{\circ}$ N) | $\alpha_{95}$<br>( $^{\circ}$ ) | Number<br>of NNE<br>directions | Number<br>of SW<br>directions |
|------------------------------------|-----|-----------------------|-----------------------|---------------------------------|--------------------------------|-------------------------------|
| <b>Schmidt and Williams (1995)</b> |     |                       |                       |                                 |                                |                               |
| Elatina Fm sample data             | 79  | 197.3                 | -5.3                  | 7.4                             | 52                             | 27                            |
| Elatina Fm site mean data          | 10  | 197.4                 | -7.1                  | 15.2                            | 7                              | 3                             |
| <b>This study</b>                  |     |                       |                       |                                 |                                |                               |
| Elatina Fm sample data             | 126 | 215.1                 | -17.2                 | 4.5                             | 45                             | 81                            |
| Elatina Fm site mean data          | 58  | 212.1                 | -16.9                 | 6.2                             | 25                             | 33                            |

Note: N is the number of sites or samples; Dm, Im are the mean declination, inclination;  $\alpha_{95}$  is the radius of 95% circle of confidence for the mean direction.

## PART A

### SAMPLING AND ANALYTICAL PROCEDURES FOR SAMPLES FROM THE CENTRAL FLINDERS RANGES

Stratigraphic sections for sampling were chosen on the basis of completeness of outcrop exposure and the possibility of performing a fold test to constrain the age of magnetization. Sample sites were spaced an average of 1.5 meters apart for the glacial deposits, and at varying intervals for non-glacial deposits depending upon the thickness of the section and the quality of outcrop. Most samples were collected with a portable rock drill directly from outcrop as 2.5-cm-diameter cores and were oriented with a Brunton compass. A few of the sites, including all of the Trezona carbonate sites, were sampled as oriented blocks and later cored in the lab. One to four cores were collected from each outcrop site or oriented block. Sample cores were trimmed to 2.2 cm in length; cores that were more than 5 cm in length were divided into subsamples.

All sample treatments and measurements were made within a shielded room with an ambient magnetic field of  $<300$  nT. AF demagnetization in fields up to 100 mT performed on a subset of twelve samples of red sandstones and siltstones from the Flinders Ranges was ineffective in decomposing the NRM, suggesting that very high coercivity hematite was likely the principal remanence carrier. Subsequent samples were therefore thermally demagnetized, in 15 to 20 steps, to a maximum of  $695^{\circ}\text{C}$  in a custom-built, shielded thermal demagnetizer where the ambient magnetic field was checked and reduced to less than 5 nT at each heating step. Each sample's magnetic remanence remaining after each heating step was measured in a 2G three-axis superconducting rock magnetometer, and its low-field magnetic susceptibility was measured with a Bartington instrument to monitor any alteration in magnetic mineralogy after heating. A group of 31 samples, representing different lithologies and grain sizes from each stratigraphic section, was subjected to thermal demagnetization of isothermal remanent magnetization (IRM) after the method of Lowrie (1990) to help identify the magnetic mineralogy present in the samples.

The thermal demagnetization trajectories of NRM for samples from the central Flinders Ranges (e.g., Fig. 4) revealed the presence of up to three components of magnetization, designated as A = low-temperature stable component, B = possible intermediate stable component, and C = high temperature stable component. Initial principal component analysis (pca) of the thermal demagnetization data (method of Kirschvink, 1980) on a sample-by-sample basis revealed some variation in the temperature ranges of the same components between sites, and in some cases even between different samples from the same site, even though the remanence directions are similar and susceptibility  $\chi$  remained relatively constant at values less than 15-20. The A components, with overall moderately steep inclinations and northerly declination in geographic coordinates, persisted from NRM (i.e., no treatment) to  $200^{\circ}$ - $400^{\circ}\text{C}$ ; the C component, with its shallow inclinations and SSW and NNE declinations, ranged from  $575$ - $620^{\circ}\text{C}$  to  $650$ - $690^{\circ}\text{C}$ ; and the B component, with a range of shallow to moderately steep inclinations and largely NW declinations, appeared to extend from  $200$ - $400^{\circ}\text{C}$  up to  $575$ - $650^{\circ}\text{C}$ .

Such variability was also encountered in previous paleomagnetic studies, particularly from the Flinders Ranges (e.g., Embleton and Giddings, 1974; Klootwijk, 1980; Schmidt et al., 1991). Klootwijk (1980) attributed the variability to the presence of a mixture of authigenic materials at the outset (Larson and Walker, 1975), possibly enhanced by variability of thermomagnetic properties of these minerals upon oxidation (Ryabushkin, 1976). In these studies, the researchers addressed the analytical problem by using individual sample directions, rather than site means, to calculate average directions and paleopole positions, which has the additional result of yielding a statistically more precise result. While such an approach is generally considered valid in paleomagnetism, it is worth questioning whether we can actually "know" mean directions with such great precision when the thermal demagnetization data clearly show that the rocks' magnetization histories are not simple.

We have taken several steps to address the problem of intra- and inter-site variability in calculating the mean directions and paleopoles. First, the principal component analysis (pca) for each formation was redone, using temperature endpoints that represented the most common result for that formation in that section. (These generally corresponded to components defined as A = NRM to 300°C, B = 300°-575°C, and C = 575°-680°C.) Any component vector defined by the blanket pca whose maximum angular deviation (MAD) was greater than 15° was considered ill defined, and was not included in subsequent analyses (Butler, 1992). The remaining data were plotted on equal-area stereoplots to identify spatial clusters or trends. Since the A component was typically well defined, any sample with an A component direction that deviated widely from the general group cluster was considered to be possibly mis-oriented, and all data pertaining to that sample were discarded as potentially unreliable. For all components, scattered data points that did not cluster with the bulk of the data were also discarded in order to improve the statistics, as long as the overall mean was not significantly affected. Discard of sample data from each of the Flinders Ranges sections owing to excessive MAD was an average 34.4%; scattered data points totaled an average of 28.8%. The data for a total of 358 out of 567 samples from the Yaltipena and Elatina formations were therefore not used for subsequent analyses or interpretations. Site mean directions were calculated, where possible, from the remaining data. For some sites, the mean direction is represented by the sole remaining sample for that site, and has been included because the sample direction resembles site means calculated from multiple samples elsewhere in the section.

## PART B

### ADDITIONAL DATA ON SAMPLING SITES OUTSIDE THE CENTRAL FLINDERS RANGES

#### Stratigraphic Context

**Stuart Shelf.** The Marinoan glacial unit in this region is the Whyalla Sandstone, a buff-colored, tectonically undeformed, poorly cemented unit containing coarse, very well-rounded and frosted quartz grains in a bimodal distribution with fine-grained angular quartz, feldspar and lithic fragments (Preiss, 1987). At its type location, the Cattlegrid Copper Mine at Mt. Gunson (Fig. 1A), the Whyalla Sandstone includes at least four generations of sand wedges, periglacial features associated with the cracking and subsequent in-filling by sand of frozen ground (i.e., permafrost; Williams and Tonkin, 1985). The most spectacular of these wedges (up to 1.5 m in diameter at their widest points) lie at the contact between the Whyalla Sandstone and the underlying Mesoproterozoic Pandurra Formation (Busbridge, 1981; Fanning et al., 1983; Drexel et al., 1993), a reddish-purple quartzite that is brecciated at the contact. The upper 10 m within the mine pit contains four or five major surfaces bounding cross-beds up to 5 m thick that are considered to be hallmarks of eolian deposition (Gersteling and Heape, 1975; Williams and Tonkin, 1985). A cap carbonate equivalent to the Nuccaleena Formation of the central Flinders Ranges can be observed in some drill cores, such as SLT 106, near the edge of the Stuart shelf (Preiss, 1986). The presence of extremely well-rounded, frosted quartz grains within granule layers within the Elatina Formation, as well as the local presence of the Nuccaleena Formation above it, provide the bases for correlating the Whyalla Sandstone with the Elatina (Fig. 2; Preiss, 1987).

**Amadeus Basin.** In the northeastern Amadeus basin (the Ooraminna sub-basin) the Marinoan glacial unit is the Olympic Formation, which consists predominantly of red siltstone with minor boulder diamictite and gritty and pebbly dolomite (see Fig. 1B; Preiss et al., 1978; Preiss, 1987; Field, 1991; Kennedy, 1994). Another stratigraphic unit partly time-equivalent to the Olympic is the Gaylad Sandstone, a relatively coarse feldspathic sandstone that represents the shallow marine equivalent of the cap carbonates (Fig. 2). Beneath the Olympic Formation, the thick mixed carbonate-siliciclastic Aralka Formation represents pre-glacial conditions similar to those inferred for the entire Sturtian-Marinoan interglacial interval in the central Flinders Ranges

(Fig. 2; Preiss, 1987; Shergold et al., 1991; Kennedy, 1994). Its uppermost member, the Limbla Member, lies disconformably to unconformably below the Olympic Formation.

### Analytical Results

**Stuart Shelf.** Paleomagnetic samples were taken from eight sites within the Whyalla Sandstone, distributed throughout the ~20-meter section exposed in the walls of the Cattlegrid Copper Mine at Mt. Gunson (31°45'S lat., 137°15'E long.). The sampled sites included were taken both within and alongside the sand wedges in the Whyalla Sandstone, as well as from two sites in the Pandurra Formation where the uppermost breccia had been folded by cryoturbation processes. Sample collection and thermal demagnetization proceeded as described above for the central Flinders Ranges samples.

The Stuart shelf samples typically display two poorly defined components, designated as A = lower temperature component and B = higher temperature component. Although these A and B components have fairly consistent temperature ranges from sample to sample (i.e., A = 0°-200°C, B = 300°-450°C), the remanence directions as defined by *pca* is widely scattered. Thermal demagnetization of IRM applied to the Whyalla Sandstone and Pandurra Formation samples show that the principal magnetic mineral present is goethite. The wide scattering of remanence directions and the presence of goethite suggests that the Stuart shelf samples carry unstable magnetizations that cannot be compared to the central Flinders Ranges paleomagnetic data; no further analysis has been attempted.

**Amadeus Basin.** The Limbla Member of the Aralka Formation was sampled at a total of 25 sites in four stratigraphic sections on Ringwood Station, a ranch ~125 km east of Alice Springs (Fig. 1B). Two of these sections are located at the Olympic Structure, approximately 12 km WNW of the Ringwood Homestead (23°46'S lat., 135°47'E long.); these sections have average bedding attitudes of strike 149°, dip 11°SW, and strike 044°, dip 82°NW. The remaining two sections are located at Olympic Bore, approximately 16 km SE of the Ringwood Homestead (23°50'S lat., 134°50'E long.); these sections have average bedding attitudes of strike 085°, dip 25°SE, and strike 027°, dip 35°SE. In both areas, the sections sampled are on opposing limbs of Devonian-Carboniferous synclines with an eye toward performing a fold test.

Samples from all sites in the Amadeus Basin yield an extremely weak, single-component magnetic remanence, designated as the A component, that persisted from 0°-575°C. Although the A component is typically well defined within a given sample, the overall remanence directions are widely scattered. Thermal demagnetization of IRM applied to test samples from the Amadeus basin suggests that the dominant magnetic mineral present is magnetite, which has the potential to yield stable remanence directions; however, there may simply be too little magnetic material present within the sandstone sampled to yield a coherent magnetization. As with the data from the Stuart shelf, the wide scatter of the magnetization in these samples does not permit comparison with the central Flinders paleomagnetic data; no further analysis has been attempted.

### References cited in appendices

- Busbridge, M., 1981, An analysis of the sedimentary host rocks to mineralisation at the Cattlegrid Orebody, Mt. Gunson [B.Sc. (Hons) thesis]: Adelaide, South Australia, University of Adelaide, 61 p.
- Butler, R.F., 1992, Paleomagnetism: Magnetic Domains to Geologic Terranes: Boston, Blackwell Scientific Publications, 319 p.

- Drexel, J.F., Preiss, W.V., and Parker, A.J., eds., 1993, *The Geology of South Australia: The Precambrian*: Geological Survey of South Australia Bulletin 54, v. 1, 242 p.
- Embleton, B.J.J., and Giddings, J.W., 1974, Late Precambrian and Lower Palaeozoic palaeomagnetic results from South Australia and Western Australia: *Earth and Planetary Science Letters*, v. 22, p. 355-365.
- Fanning, C.M., Flint, R.B., and Preiss, W.V., 1983, Geochronology of the Pandurra Formation: *South Australian Geological Survey Quarterly Geological Notes*, v. 88, p. 11-16.
- Field, B.D., 1991, Paralic and periglacial facies and contemporaneous deformation of the Late Proterozoic Olympic Formation, Pioneer Sandstone and Gaylad Sandstone, Amadeus Basin, central Australia, *in* Korsch, R.J., and Kennard, J.M., eds., *Geological and Geophysical Studies in the Amadeus Basin, Central Australia*: Bureau of Mineral Resources, Geology and Geophysics Bulletin 236, p. 127-136.
- Gersteling, R.W., and Heape, J.M., 1975, The Cattlegrid Orebody, Mt. Gunson, South Australia, *in* *South Australian Conference, 1975, Part A: Adelaide and Port Pirie*: Parkville, Victoria, Australasian Institute of Mining and Metallurgy, Conference Series, v. 4, p. 103-112.
- Karner, G.D., 1974, Palaeomagnetism of the Brachina Formation at Hallett Cove, South Australia [B.Sc. (Hons) thesis]: Adelaide, South Australia, Flinders University, 62 p.
- Kennedy, M.J., 1994, The influence of diapirism and deglaciation on the development of the Neoproterozoic stratigraphy of the Amadeus Basin, central Australia [Ph.D. dissert.]: Adelaide, South Australia, University of Adelaide, 186 p.
- Kirschvink, J.L., 1980, The least-squares line and plane and the analysis of palaeomagnetic data: *Geophysical Journal of the Royal Astronomical Society*, v. 62, p. 699-718.
- Klootwijk, C.T., 1980, Early Palaeozoic palaeomagnetism in Australia: *Tectonophysics*, v. 64, p. 249-332.
- Larson, E.E., and Walker, T.R., 1975, Development of chemical remanent magnetization during early stages of red-bed formation in Late Cenozoic sediments, Baja California: *Geological Society of America Bulletin*, v. 86, p. 639-650.
- Preiss, W.V., compiler, 1986, *Adelaide Geosyncline and Stuart Shelf: Precambrian and Palaeozoic Geology (with special reference to the Adelaidean)*: Adelaide, Department of Mines and Energy, 1:600,000 scale, 1 sheet.
- Preiss, W.V., compiler, 1987, *The Adelaide Geosyncline: Late Proterozoic Stratigraphy, Sedimentation, Palaeontology and Tectonics*: Geological Survey of South Australia Bulletin 53, 438 p.
- Preiss, W.V., Walter, M.R., Coats, R.P., and Wells, A.T., 1978, Lithological correlations of Adelaidean glaciogenic rocks in parts of the Amadeus, Ngalia and Georgina Basins: *BMR Journal of Australian Geology and Geophysics*, v. 3, p. 43-53.
- Ryabushkin, P.K., 1976, Variability of magneto-mineralized properties of iron hydroxides: *Physics of the Solid Earth*, v. 11, p. 52-58.
- Schmidt, P.W., Williams, G.E., and Embleton, B.J.J., 1991, Low palaeolatitude of Late Proterozoic glaciation: Early timing of remanence in haematite of the Elatina Formation, South Australia: *Earth and Planetary Science Letters*, v. 105, p. 355-367.
- Williams, G.E., and Tonkin, D.G., 1985, Periglacial structures and palaeoclimatic significance of a late Precambrian block field in the Cattle Grid copper mine, Mount Gunson, South Australia: *Australian Journal of Earth Sciences*, v. 32, p. 287-300.
